# Supplementary material for: Genetic Structure of Native Blue Honeysuckle Populations in the Western and Eastern Eurasian Ranges
Source: MDPI journal article supplement (doi:10.3390/plants11111480), 2022-05-31
Supplement: s1 [file s1]

Table S1. *Lonicera caerulea* sample codes and NCBI GenBank accession numbers of corresponding psbA-trnH and trnL-trnF region sequences.

| Sample code | psbA-trnH | trnL-trnF |
|-------------|-----------|-----------|
| LV1-1       | ON212105  | ON212167  |
| LV1-2       | ON212106  | ON212168  |
| LV1-3       | ON212107  | ON212169  |
| LV1-6       | ON212108  | ON212170  |
| LV1-12      | ON212109  | ON212171  |
| LV2-1       | ON212110  | ON212172  |
| LV2-3       | ON212111  | ON212173  |
| LV2-4       | ON212112  | ON212174  |
| LV2-7       | ON212113  | ON212175  |
| LV2-10      | ON212114  | ON212176  |
| LV3-1       | ON212115  | ON212177  |
| LV3-2       | ON212116  | ON212178  |
| LV3-4       | ON212117  | ON212179  |
| LV3-6       | ON212118  | ON212180  |
| LV3-11      | ON212119  | ON212181  |
| LV4-2       | ON212120  | ON212182  |
| LV4-3       | ON212121  | ON212183  |
| LV4-6       | ON212122  | ON212184  |
| LV4-7       | ON212123  | ON212185  |
| LV4-10      | ON212124  | ON212186  |
| EE-1        | ON212125  | ON212187  |
| EE-3        | ON212126  | ON212188  |
| EE-4        | ON212127  | ON212189  |
| EE-9        | ON212128  | ON212190  |
| EE-10       | ON212129  | ON212191  |
| EE-11       | ON212130  | ON212192  |
| EE-14       | ON212131  | ON212193  |
| RU1-1       | ON212132  | ON212194  |
| RU1-3       | ON212133  | ON212195  |
| RU1-4       | ON212134  | ON212196  |

|              |          |          |
|--------------|----------|----------|
| RU1-5        | ON212135 | ON212197 |
| RU1-10       | ON212136 | ON212198 |
| RU1-13       | ON212137 | ON212199 |
| RU1-14       | ON212138 | ON212200 |
| RU1-15       | ON212139 | ON212201 |
| RU1-18       | ON212140 | ON212202 |
| RU1-20       | ON212141 | ON212203 |
| RU2-1        | ON212142 | ON212204 |
| RU2-3        | ON212143 | ON212205 |
| RU2-7        | ON212144 | ON212206 |
| RU2-9        | ON212145 | ON212207 |
| RU2-13       | ON212146 | ON212208 |
| RU2-16       | ON212147 | ON212209 |
| RU2-17       | ON212148 | ON212210 |
| RU3-1        | ON212149 | ON212211 |
| RU3-2        | ON212150 | ON212212 |
| RU3-4        | ON212151 | ON212213 |
| RU3-6        | ON212152 | ON212214 |
| RU3-10       | ON212153 | ON212215 |
| RU3-11       | ON212154 | ON212216 |
| RU3-12       | ON212155 | ON212217 |
| RU3-18       | ON212156 | ON212218 |
| JP-1-(TA)    | ON212157 | ON212219 |
| JP-2-(YO-1)  | ON212158 | ON212220 |
| JP-6-(BK)    | ON212159 | ON212221 |
| JP-7-(KI-1)  | ON212160 | ON212222 |
| JP-8-(KI-2)  | ON212161 | ON212223 |
| JP-10-(KI-4) | ON212162 | ON212224 |
| JP-15-(NI-1) | ON212163 | ON212225 |
| JP-16-(NI-2) | ON212164 | ON212226 |
| JP-19-(TO)   | ON212165 | ON212227 |
| JP-21-(AP-1) | ON212166 | ON212228 |

---
